# Supplementary material for: Mouse Gonad Development in the Absence of the Pro-Ovary Factor WNT4 and the Pro-Testis Factor SOX9
Source: PubMed Central journal article supplement (PMC7291083; doi:10.3390/cells9051103), 2020-04-29
Supplement: cells-09-01103-s001.pdf [file cells-09-01103-s001.pdf]

1  
2  
3  
4  
5  
6  
7  
8  
9  
10  
11

# Mouse gonad development in the absence of the pro-ovarian factor WNT4 and the pro-testis factor SOX9

Furong Tang<sup>1</sup>, Nainoa Richardson<sup>1</sup>, Audrey Albina<sup>1</sup>, Marie-Christine Chaboissier<sup>1,‡</sup> and Aitana Perea-Gomez<sup>1,‡,\*</sup>

## Supplementary Materials

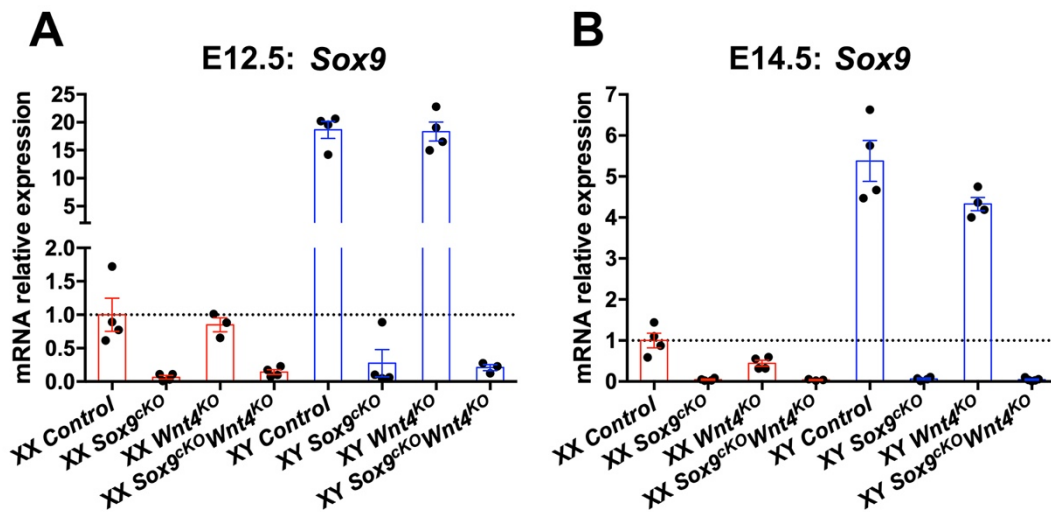

12  
13  
14  
15  
16  
17  
18  
19  
20  
21  
22  
23

Figure S1. *Sox9* expression in control and mutant gonads at E12.5 and E14.5. RT-quantitative PCR analysis of *Sox9* expression in E12.5 (A) and E14.5 (B) XX and XY gonads of Control, *Sox9*<sup>KO</sup>, *Wnt4*<sup>KO</sup> and *Sox9*<sup>KO</sup>*Wnt4*<sup>KO</sup> genotypes (n = 3 to 5 embryos for each genotype). Expression level in XX controls is 1. Graphs show individual values of the relative normalized expression levels (dots), and the mean fold-change (bars) ± SEM.

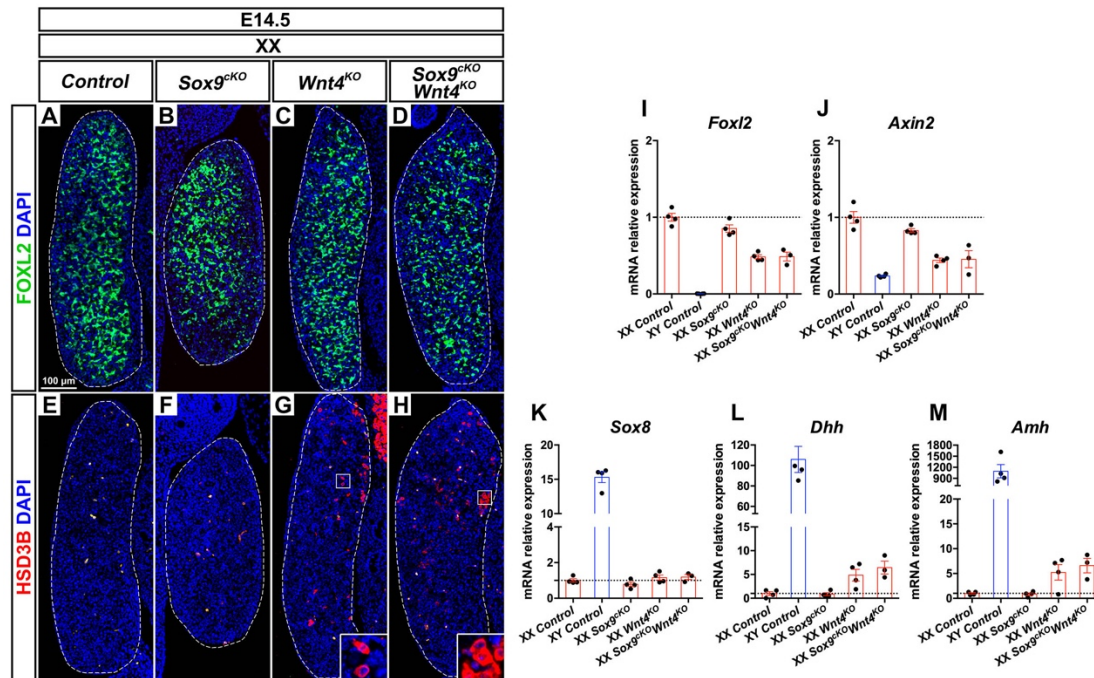

24

25 **Figure S2. Phenotype of E14.5 XX control and mutant gonads.** (A-D) Immunodetection of the pre-  
 26 granulosa cell marker FOXL2 (green) in E14.5 XX gonads of Control (A), *Sox9<sup>cKO</sup>* (B), *Wnt4<sup>KO</sup>* (C) and  
 27 *Sox9<sup>cKO</sup>Wnt4<sup>KO</sup>* (D) genotypes. (E-H) Immunodetection of the steroidogenic enzyme HSD3B (red) in  
 28 E14.5 XX gonads of Control (E), *Sox9<sup>cKO</sup>* (F), *Wnt4<sup>KO</sup>* (G) and *Sox9<sup>cKO</sup>Wnt4<sup>KO</sup>* (H) genotypes. (I-M) RT-  
 29 quantitative PCR analysis of *Foxl2* (I), *Axin2* (J), *Sox8* (K), *Dhh* (L) and *Amh* (M) expression in E14.5  
 30 gonads of XX Control, XY Control, XX *Sox9<sup>cKO</sup>*, XX *Wnt4<sup>KO</sup>* and XX *Sox9<sup>cKO</sup>Wnt4<sup>KO</sup>* genotypes (n = 3 to 4  
 31 embryos for each genotype). Expression level in XX controls is 1. Graphs show individual values  
 32 (dots), and the mean fold-change (bars) ± SEM. Nuclei labeled with DAPI are shown in blue.  
 33 Magnification is the same in all panels. Scale bar = 100 μm. Gonads are outlined with broken white  
 34 lines.

35

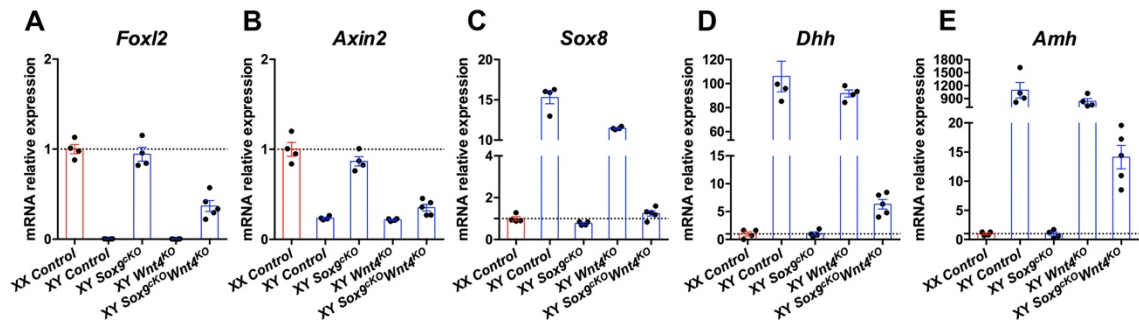

36

37

**Figure S3. Quantitative PCR analysis of gene expression in XY control and mutant gonads at E14.5.**

38

RT-quantitative PCR analysis of *Foxl2* (A), *Axin2* (B), *Sox8* (C), *Dhh* (D) and *Amh* (E) expression in

39

E14.5 gonads of XX Control, XY Control, XY Sox9<sup>KO</sup>, XY Wnt4<sup>KO</sup> and XY Sox9<sup>KO</sup>Wnt4<sup>KO</sup> genotypes (n =

40

4 to 5 embryos for each genotype). Expression level in XX controls is 1. Graphs show individual values

41

of the relative normalized expression levels (dots), and the mean fold-change (bars) ± SEM.

42

43

44

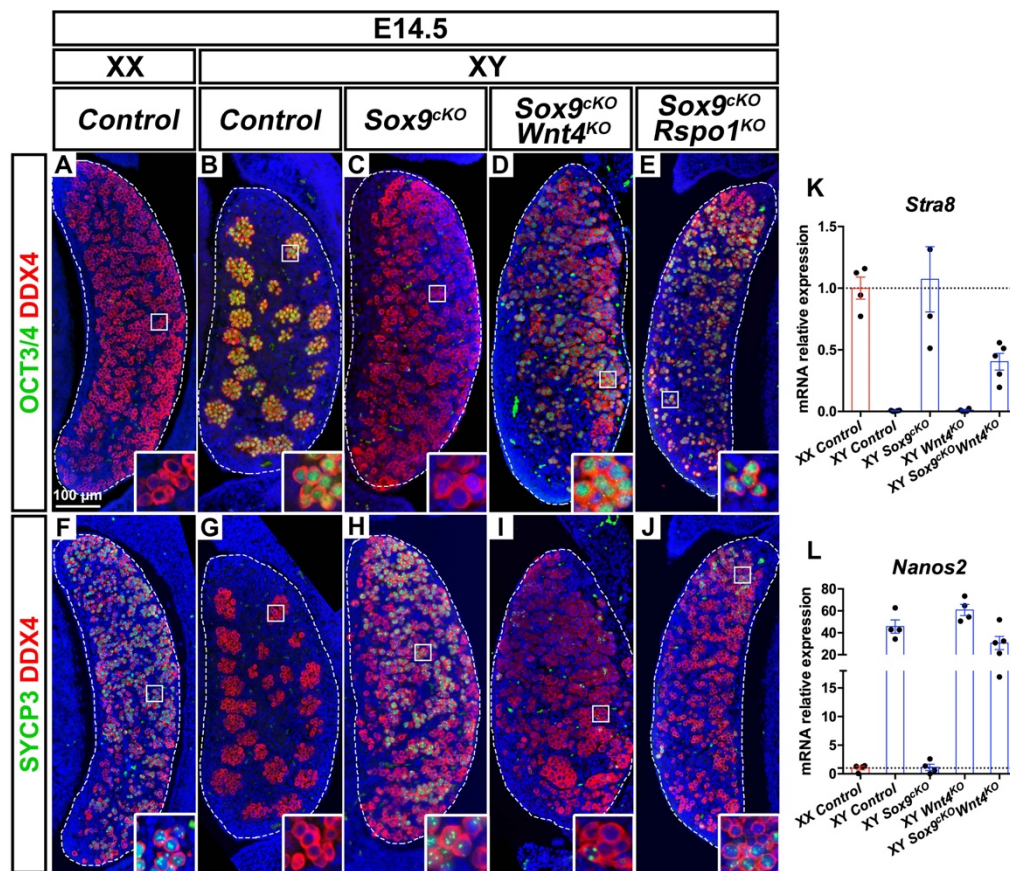

45

46 **Figure S4. Germ cell development in XY control and mutant gonads at E14.5. (A-E)**  
 47 Immunodetection of germ cell marker DDX4 (red) and the pluripotent cell marker OCT3/4 (green) in  
 48 E14.5 gonads of XX Control (A), XY Control (B), XY *Sox9<sup>ckO</sup>* (C), XY *Sox9<sup>ckO</sup>Wnt4<sup>ckO</sup>* (D) and XY  
 49 *Sox9<sup>ckO</sup>Rspo1<sup>ckO</sup>* (E) genotypes. (F-J) Immunodetection of germ cell marker DDX4 (red) and the meiosis  
 50 marker SYCP3 (green) in E14.5 gonads of XX Control (F), XY Control (G), XY *Sox9<sup>ckO</sup>* (H), XY  
 51 *Sox9<sup>ckO</sup>Wnt4<sup>ckO</sup>* (I) and XY *Sox9<sup>ckO</sup>Rspo1<sup>ckO</sup>* (J) genotypes. The majority of germ cells in XY *Sox9<sup>ckO</sup>Wnt4<sup>ckO</sup>*  
 52 and XY *Sox9<sup>ckO</sup>Rspo1<sup>ckO</sup>* express OCT3/4 like in XY controls. Only a few meiotic germ cells expressing  
 53 SYCP3 can be observed at this stage in double mutant gonads. (K-L) RT-quantitative PCR analysis of  
 54 the meiosis marker *Stra8* (K) and the male germ cell marker *Nanos2* (L) in E14.5 gonads of XX Control,  
 55 XY Control, XY *Sox9<sup>ckO</sup>*, XY *Wnt4<sup>ckO</sup>* and XY *Sox9<sup>ckO</sup>Wnt4<sup>ckO</sup>* genotypes (n = 4 to 5 embryos for each  
 56 genotype). Expression level in XX controls is 1. Graphs show individual values of the relative  
 57 normalized expression levels (dots), and the mean fold-change (bars) ± SEM. Nuclei labeled with  
 58 DAPI are shown in blue. Magnification is the same in all panels. Scale bar = 100 μm. Gonads are  
 59 outlined with broken white lines.

60

61

62

63

**Table S1: Antibodies for immunodetection.**

| Antibody | Species | Supplier                     | Reference    | Dilution |
|----------|---------|------------------------------|--------------|----------|
| DDX4     | Rabbit  | Abcam                        | ab13840      | 200X     |
| TRA98    | Rat     | Abcam                        | 82527        | 200X     |
| AMH      | Mouse   | Bio-Rad Laboratories         | MCA2246      | 30X      |
| AMH      | Goat    | Santa Cruz Biotechnology     | sc6886       | 200X     |
| OCT3/4   | Mouse   | BD Transduction Laboratories | 611202       | 200X     |
| FOXL2    | Goat    | Novus Biologicals            | NB100-1277SS | 200X     |
| NR2F2    | Mouse   | R&D Systems                  | PP-H7147-00  | 200X     |
| SOX9     | Rabbit  | Merck KGaA                   | HPA001758    | 250X     |
| P27      | Rabbit  | Santa Cruz Biotechnology     | sc-52        | 200X     |
| DMRT1    | Mouse   | Santa Cruz Biotechnology     | SC-377167    | 200X     |
| HSD3B    | Goat    | Santa Cruz Biotechnology     | sc-30820     | 200X     |
| SYCP3    | Mouse   | Santa Cruz Biotechnology     | Sc-74569     | 200X     |
| SRY      | Rabbit  | Dagmar Wilhelm's Lab         |              | 200X     |
| SDMG1    | Rabbit  | Ian Adams's Lab              |              | 600X     |

64

65

**Table S2: quantitative-PCR primers.**

66

67

68

69

70

71

| Gene          | Forward 5' - 3'         | Reverse 5' - 3'       |
|---------------|-------------------------|-----------------------|
| <i>Axin2</i>  | GCAAGTCCAAGCCCCATA      | CGGCTGACTCGTTCTCCT    |
| <i>Foxl2</i>  | ATCGGGGTTCCTCAACAAC     | CATCTGGCAGGAGGCGTA    |
| <i>Fst</i>    | GCCTATGAGGGAAAGTGTATCAA | TGGAATCCCATAGGCATTTT  |
| <i>Sox9</i>   | GCGGAGCTCAGCAAGACTCTG   | ATCGGGGTGGTCTTTCTTGTC |
| <i>Sox8</i>   | GACCCTAGGCAAGCTGTGG     | CTGCACACGGAGCCTCTC    |
| <i>Egf9</i>   | TGCAGGACTGGATTTCAATTTAG | CCAGGCCCACTGCTATACTG  |
| <i>Dhh</i>    | GGACCTCGTACCCAATACTACAA | CGATGGCTAGAGCGTTCACC  |
| <i>Amh</i>    | GGGGAGACTGGAGAACAGC     | AGAGCTCGGGCTCCCATA    |
| <i>Nanos2</i> | AGGTCCCCGATCTCAAC       | CAGCATTTCCAGTGTTTCAG  |
| <i>Stra8</i>  | TGACGTGGCAAGTTTCCTG     | GTTGCAGGTGGCAAACATAG  |
